# Supplementary material for: Assessing the practical differences between model selection methods in inferences about choice response time tasks
Source: PubMed Central journal article supplement (PMC6710222; doi:10.3758/s13423-018-01563-9), 2019-02-19
Supplement: 13423_2018_1563_MOESM1_ESM.pdf [file 13423_2018_1563_MOESM1_ESM.pdf]

## Appendix

## Exact values from all figures

The following tables provide the exact numerical values from each of the figures in the main text, as the figures in text only provide a broad, general patterns in the data. Specifically, there is a single table for each figure, presented in the same order.

Table A1: Corresponds to Figure 1. The first three columns refer to the drift effect (null, small, moderate, large), threshold effect (null, small moderate, large), and when both effects are present whether they are balanced or extreme. Numbers listed here are the number of correct model identifications out of a possible 100.

| D | T | B/E | AIC | WAIC | DIC | DIC <sub>p</sub> | BIC | BF-BS | BF-TI | ROPE <sub>a</sub> | DEV |
|---|---|-----|-----|------|-----|------------------|-----|-------|-------|-------------------|-----|
| L | L | B   | 100 | 100  | 100 | 100              | 100 | 100   | 100   | 100               | 100 |
| L | L | E   | 100 | 100  | 100 | 100              | 100 | 100   | 100   | 100               | 100 |
| L | M | B   | 100 | 100  | 100 | 100              | 100 | 100   | 99    | 100               | 100 |
| L | M | E   | 99  | 99   | 99  | 99               | 98  | 98    | 97    | 99                | 99  |
| L | S | B   | 78  | 83   | 81  | 48               | 35  | 40    | 41    | 61                | 57  |
| L | S | E   | 79  | 83   | 84  | 50               | 34  | 24    | 25    | 60                | 59  |
| M | L | B   | 100 | 100  | 100 | 96               | 96  | 98    | 97    | 99                | 100 |
| M | L | E   | 100 | 100  | 100 | 99               | 96  | 95    | 95    | 100               | 100 |
| M | M | B   | 100 | 100  | 100 | 100              | 99  | 99    | 99    | 100               | 100 |
| M | M | E   | 100 | 100  | 100 | 98               | 93  | 97    | 96    | 98                | 100 |
| M | S | B   | 73  | 80   | 81  | 50               | 39  | 35    | 43    | 57                | 54  |
| M | S | E   | 77  | 78   | 80  | 45               | 29  | 27    | 25    | 47                | 54  |
| S | L | B   | 62  | 72   | 70  | 38               | 26  | 41    | 33    | 54                | 46  |
| S | L | E   | 61  | 69   | 69  | 29               | 24  | 26    | 31    | 47                | 41  |
| S | M | B   | 73  | 79   | 81  | 43               | 28  | 32    | 34    | 56                | 50  |
| S | M | E   | 75  | 80   | 81  | 38               | 33  | 34    | 37    | 55                | 53  |
| S | S | B   | 51  | 64   | 67  | 21               | 12  | 14    | 11    | 35                | 53  |
| S | S | E   | 42  | 51   | 51  | 6                | 2   | 1     | 4     | 9                 | 12  |
| L | N |     | 85  | 74   | 76  | 97               | 99  | 99    | 99    | 95                | 94  |
| M | N |     | 78  | 70   | 72  | 96               | 99  | 99    | 98    | 91                | 95  |
| S | N |     | 69  | 69   | 68  | 63               | 60  | 63    | 60    | 41                | 72  |
| N | L |     | 87  | 73   | 71  | 99               | 100 | 93    | 94    | 93                | 96  |
| N | M |     | 83  | 65   | 62  | 97               | 100 | 96    | 97    | 94                | 96  |
| N | S |     | 76  | 56   | 55  | 72               | 65  | 53    | 53    | 49                | 76  |
| N | N |     | 78  | 57   | 56  | 98               | 99  | 99    | 97    | 95                | 90  |

Table A2: Corresponds to Figure 2. The first three columns refer to the drift effect (null, small, moderate, large), threshold effect (null, small moderate, large), and when both effects are present whether they are balanced or extreme. Numbers listed here are the average Brier scores for model selections.

| D | T | B/E | AIC  | WAIC | DIC  | DIC <sub>p</sub> | BIC   | BF-BS | BF-TI | ROPE <sub>a</sub> |
|---|---|-----|------|------|------|------------------|-------|-------|-------|-------------------|
| L | L | B   | 1    | 1    | 1    | 1                | 1     | 1     | 1     | 1                 |
| L | L | E   | 1    | 1    | 1    | 1                | 1     | 1     | 1     | 1                 |
| L | M | B   | 1    | 1    | 1    | 1                | 1     | 1     | 0.98  | 1                 |
| L | M | E   | 0.99 | 0.99 | 0.99 | 0.98             | 0.96  | 0.95  | 0.93  | 0.98              |
| L | S | B   | 0.65 | 0.72 | 0.71 | 0.14             | -0.14 | -0.14 | -0.12 | 0.32              |
| L | S | E   | 0.65 | 0.71 | 0.72 | 0.15             | -0.16 | -0.28 | -0.29 | 0.27              |
| M | L | B   | 1    | 0.99 | 0.99 | 0.94             | 0.93  | 0.97  | 0.96  | 0.98              |
| M | L | E   | 1    | 1    | 1    | 0.95             | 0.92  | 0.9   | 0.91  | 0.98              |
| M | M | B   | 1    | 1    | 1    | 0.99             | 0.97  | 0.97  | 0.96  | 0.99              |
| M | M | E   | 0.99 | 0.99 | 1    | 0.95             | 0.89  | 0.92  | 0.91  | 0.97              |
| M | S | B   | 0.62 | 0.7  | 0.71 | 0.17             | -0.13 | -0.14 | -0.09 | 0.23              |
| M | S | E   | 0.62 | 0.66 | 0.66 | 0.03             | -0.22 | -0.29 | -0.33 | 0.05              |
| S | L | B   | 0.47 | 0.58 | 0.58 | -0.11            | -0.3  | -0.08 | -0.15 | 0.09              |
| S | L | E   | 0.48 | 0.54 | 0.56 | -0.19            | -0.33 | -0.24 | -0.22 | -0.01             |
| S | M | B   | 0.59 | 0.66 | 0.68 | -0.03            | -0.24 | -0.11 | -0.11 | 0.19              |
| S | M | E   | 0.6  | 0.68 | 0.7  | -0.03            | -0.19 | -0.1  | -0.07 | 0.12              |
| S | S | B   | 0.3  | 0.44 | 0.46 | -0.28            | -0.53 | -0.55 | -0.54 | -0.09             |
| S | S | E   | 0.2  | 0.26 | 0.28 | -0.42            | -0.58 | -0.54 | -0.57 | -0.34             |
| L | N |     | 0.58 | 0.45 | 0.45 | 0.89             | 0.97  | 0.97  | 0.94  | 0.85              |
| M | N |     | 0.55 | 0.42 | 0.42 | 0.88             | 0.96  | 0.97  | 0.92  | 0.81              |
| S | N |     | 0.39 | 0.33 | 0.34 | 0.37             | 0.27  | 0.33  | 0.28  | -0.07             |
| N | L |     | 0.63 | 0.46 | 0.41 | 0.92             | 0.98  | 0.85  | 0.89  | 0.89              |
| N | M |     | 0.6  | 0.37 | 0.32 | 0.9              | 0.98  | 0.89  | 0.92  | 0.87              |
| N | S |     | 0.4  | 0.23 | 0.21 | 0.47             | 0.35  | 0.14  | 0.11  | 0.07              |
| N | N |     | 0.33 | 0.15 | 0.13 | 0.83             | 0.95  | 0.96  | 0.92  | 0.84              |

Table A3: Corresponds to Figure 3. The first three columns refer to the drift effect (null, small, moderate, large), threshold effect (null, small moderate, large), and when both effects are present whether they are balanced or extreme. Numbers listed here are the number of correct drift identifications out of a possible 100.

| D | T | B/E | AIC | WAIC | DIC | DIC <sub>p</sub> | BIC | BF-BS | BF-TI | ROPE <sub>α</sub> | DEV |
|---|---|-----|-----|------|-----|------------------|-----|-------|-------|-------------------|-----|
| L | L | B   | 100 | 100  | 100 | 100              | 100 | 100   | 100   | 100               | 100 |
| L | L | E   | 100 | 100  | 100 | 100              | 100 | 100   | 100   | 100               | 100 |
| L | M | B   | 100 | 100  | 100 | 100              | 100 | 100   | 100   | 100               | 100 |
| L | M | E   | 100 | 100  | 100 | 100              | 100 | 100   | 100   | 100               | 100 |
| L | S | B   | 100 | 100  | 100 | 100              | 100 | 100   | 100   | 100               | 100 |
| L | S | E   | 100 | 100  | 100 | 100              | 100 | 100   | 100   | 100               | 100 |
| M | L | B   | 100 | 100  | 100 | 96               | 96  | 98    | 97    | 99                | 100 |
| M | L | E   | 100 | 100  | 100 | 99               | 96  | 95    | 95    | 100               | 100 |
| M | M | B   | 100 | 100  | 100 | 100              | 99  | 99    | 99    | 100               | 100 |
| M | M | E   | 100 | 100  | 100 | 99               | 96  | 100   | 98    | 100               | 100 |
| M | S | B   | 100 | 100  | 100 | 100              | 100 | 100   | 100   | 100               | 100 |
| M | S | E   | 100 | 100  | 100 | 96               | 96  | 97    | 96    | 99                | 99  |
| S | L | B   | 62  | 72   | 70  | 38               | 26  | 41    | 33    | 54                | 46  |
| S | L | E   | 61  | 69   | 69  | 29               | 24  | 26    | 31    | 47                | 41  |
| S | M | B   | 73  | 79   | 81  | 43               | 28  | 32    | 34    | 56                | 50  |
| S | M | E   | 75  | 80   | 81  | 38               | 33  | 35    | 38    | 55                | 53  |
| S | S | B   | 58  | 72   | 74  | 24               | 13  | 15    | 15    | 52                | 59  |
| S | S | E   | 60  | 66   | 69  | 42               | 43  | 48    | 48    | 42                | 45  |
| L | N |     | 100 | 100  | 100 | 100              | 100 | 100   | 100   | 100               | 100 |
| M | N |     | 100 | 100  | 100 | 100              | 100 | 100   | 100   | 100               | 100 |
| S | N |     | 79  | 89   | 92  | 64               | 60  | 63    | 61    | 43                | 74  |
| N | L |     | 87  | 73   | 71  | 99               | 100 | 93    | 94    | 93                | 96  |
| N | M |     | 83  | 65   | 62  | 97               | 100 | 96    | 97    | 94                | 96  |
| N | S |     | 78  | 58   | 57  | 87               | 90  | 83    | 83    | 94                | 85  |
| N | N |     | 89  | 70   | 69  | 100              | 100 | 99    | 97    | 96                | 94  |

Table A4: Corresponds to Figure 4. The first three columns refer to the drift effect (null, small, moderate, large), threshold effect (null, small moderate, large), and when both effects are present whether they are balanced or extreme. Numbers listed here are the average Brier scores for drift selections.

| D | T | B/E | AIC  | WAIC  | DIC   | DIC <sub>p</sub> | BIC   | BF-BS | BF-TI | ROPE <sub>a</sub> |
|---|---|-----|------|-------|-------|------------------|-------|-------|-------|-------------------|
| L | L | B   | 1    | 1     | 1     | 1                | 1     | 1     | 1     | 1                 |
| L | L | E   | 1    | 1     | 1     | 1                | 1     | 1     | 1     | 1                 |
| L | M | B   | 1    | 1     | 1     | 1                | 1     | 1     | 1     | 1                 |
| L | M | E   | 1    | 1     | 1     | 1                | 1     | 1     | 1     | 1                 |
| L | S | B   | 1    | 1     | 1     | 1                | 1     | 1     | 1     | 1                 |
| L | S | E   | 1    | 1     | 1     | 1                | 1     | 1     | 1     | 1                 |
| M | L | B   | 0.99 | 0.99  | 0.99  | 0.91             | 0.9   | 0.95  | 0.93  | 0.97              |
| M | L | E   | 0.99 | 1     | 1     | 0.93             | 0.88  | 0.85  | 0.87  | 0.98              |
| M | M | B   | 1    | 1     | 1     | 0.98             | 0.95  | 0.95  | 0.94  | 0.99              |
| M | M | E   | 0.99 | 1     | 1     | 0.96             | 0.9   | 0.96  | 0.94  | 0.99              |
| M | S | B   | 1    | 1     | 1     | 1                | 0.99  | 0.99  | 0.99  | 0.99              |
| M | S | E   | 0.98 | 0.98  | 0.99  | 0.92             | 0.89  | 0.91  | 0.89  | 0.96              |
| S | L | B   | 0.2  | 0.37  | 0.37  | -0.26            | -0.42 | -0.24 | -0.29 | -0.12             |
| S | L | E   | 0.21 | 0.31  | 0.34  | -0.32            | -0.45 | -0.37 | -0.35 | -0.17             |
| S | M | B   | 0.38 | 0.49  | 0.52  | -0.19            | -0.37 | -0.26 | -0.26 | -0.08             |
| S | M | E   | 0.4  | 0.52  | 0.55  | -0.19            | -0.32 | -0.24 | -0.22 | -0.1              |
| S | S | B   | 0.15 | 0.37  | 0.41  | -0.38            | -0.6  | -0.58 | -0.55 | -0.15             |
| S | S | E   | 0.28 | 0.35  | 0.39  | -0.17            | -0.21 | -0.09 | -0.15 | -0.23             |
| L | N |     | 1    | 1     | 1     | 1                | 1     | 1     | 1     | 1                 |
| M | N |     | 1    | 1     | 1     | 1                | 1     | 1     | 1     | 0.98              |
| S | N |     | 0.57 | 0.7   | 0.72  | 0.07             | -0.06 | -0.02 | -0.03 | -0.22             |
| N | L |     | 0.45 | 0.19  | 0.12  | 0.88             | 0.97  | 0.78  | 0.84  | 0.83              |
| N | M |     | 0.39 | 0.06  | -0.01 | 0.85             | 0.96  | 0.83  | 0.87  | 0.8               |
| N | S |     | 0.08 | -0.07 | -0.09 | 0.54             | 0.66  | 0.52  | 0.49  | 0.79              |
| N | N |     | 0.44 | 0.18  | 0.13  | 0.9              | 0.97  | 0.96  | 0.91  | 0.86              |

Table A5: Corresponds to Figure 5. The first three columns refer to the drift effect (null, small, moderate, large), threshold effect (null, small moderate, large), and when both effects are present whether they are balanced or extreme. Numbers listed here are the number of correct threshold identifications out of a possible 100.

| D | T | B/E | AIC | WAIC | DIC | DIC <sub>p</sub> | BIC | BF-BS | BF-TI | ROPE <sub>a</sub> | DEV |
|---|---|-----|-----|------|-----|------------------|-----|-------|-------|-------------------|-----|
| L | L | B   | 100 | 100  | 100 | 100              | 100 | 100   | 100   | 100               | 100 |
| L | L | E   | 100 | 100  | 100 | 100              | 100 | 100   | 100   | 100               | 100 |
| L | M | B   | 100 | 100  | 100 | 100              | 100 | 100   | 99    | 100               | 100 |
| L | M | E   | 99  | 99   | 99  | 99               | 98  | 98    | 97    | 99                | 99  |
| L | S | B   | 78  | 83   | 81  | 48               | 35  | 40    | 41    | 61                | 57  |
| L | S | E   | 79  | 83   | 84  | 50               | 34  | 24    | 25    | 60                | 59  |
| M | L | B   | 100 | 100  | 100 | 100              | 100 | 100   | 100   | 100               | 100 |
| M | L | E   | 100 | 100  | 100 | 100              | 100 | 100   | 100   | 100               | 100 |
| M | M | B   | 100 | 100  | 100 | 100              | 99  | 99    | 99    | 100               | 100 |
| M | M | E   | 100 | 100  | 100 | 99               | 97  | 97    | 98    | 98                | 100 |
| M | S | B   | 73  | 80   | 81  | 50               | 39  | 35    | 43    | 57                | 54  |
| M | S | E   | 77  | 78   | 80  | 49               | 33  | 30    | 29    | 48                | 55  |
| S | L | B   | 100 | 100  | 100 | 100              | 100 | 100   | 100   | 100               | 100 |
| S | L | E   | 100 | 100  | 100 | 100              | 100 | 100   | 100   | 100               | 100 |
| S | M | B   | 100 | 100  | 100 | 100              | 100 | 99    | 99    | 100               | 100 |
| S | M | E   | 100 | 100  | 100 | 100              | 100 | 99    | 99    | 100               | 100 |
| S | S | B   | 66  | 74   | 76  | 27               | 16  | 14    | 11    | 51                | 62  |
| S | S | E   | 82  | 85   | 82  | 64               | 59  | 52    | 54    | 53                | 67  |
| L | N |     | 85  | 74   | 76  | 97               | 99  | 99    | 99    | 95                | 94  |
| M | N |     | 78  | 70   | 72  | 96               | 99  | 99    | 98    | 91                | 95  |
| S | N |     | 75  | 72   | 71  | 89               | 92  | 96    | 93    | 95                | 86  |
| N | L |     | 100 | 100  | 100 | 100              | 100 | 100   | 100   | 100               | 100 |
| N | M |     | 100 | 100  | 100 | 100              | 100 | 99    | 100   | 100               | 100 |
| N | S |     | 84  | 84   | 83  | 73               | 66  | 54    | 54    | 50                | 81  |
| N | N |     | 87  | 80   | 79  | 98               | 99  | 100   | 100   | 98                | 91  |

Table A6: Corresponds to Figure 6. The first three columns refer to the drift effect (null, small, moderate, large), threshold effect (null, small moderate, large), and when both effects are present whether they are balanced or extreme. Numbers listed here are the average Brier scores for threshold selections.

| D | T | B/E | AIC  | WAIC  | DIC  | DIC <sub>p</sub> | BIC   | BF-BS | BF-TI | ROPE <sub>a</sub> |
|---|---|-----|------|-------|------|------------------|-------|-------|-------|-------------------|
| L | L | B   | 1    | 1     | 1    | 1                | 1     | 1     | 1     | 1                 |
| L | L | E   | 1    | 1     | 1    | 1                | 1     | 1     | 1     | 1                 |
| L | M | B   | 1    | 1     | 1    | 1                | 1     | 0.99  | 0.97  | 1                 |
| L | M | E   | 0.98 | 0.98  | 0.98 | 0.96             | 0.94  | 0.93  | 0.9   | 0.98              |
| L | S | B   | 0.48 | 0.58  | 0.57 | -0.09            | -0.29 | -0.28 | -0.26 | -0.01             |
| L | S | E   | 0.48 | 0.57  | 0.58 | -0.09            | -0.3  | -0.4  | -0.4  | -0.03             |
| M | L | B   | 1    | 1     | 1    | 1                | 1     | 1     | 1     | 1                 |
| M | L | E   | 1    | 1     | 1    | 1                | 1     | 1     | 1     | 1                 |
| M | M | B   | 1    | 1     | 1    | 1                | 0.98  | 0.97  | 0.96  | 1                 |
| M | M | E   | 0.99 | 1     | 1    | 0.97             | 0.93  | 0.92  | 0.93  | 0.97              |
| M | S | B   | 0.43 | 0.54  | 0.56 | -0.09            | -0.28 | -0.29 | -0.25 | -0.06             |
| M | S | E   | 0.44 | 0.51  | 0.5  | -0.12            | -0.31 | -0.38 | -0.4  | -0.13             |
| S | L | B   | 1    | 1     | 1    | 1                | 1     | 1     | 1     | 1                 |
| S | L | E   | 1    | 1     | 1    | 1                | 1     | 1     | 1     | 1                 |
| S | M | B   | 1    | 1     | 1    | 1                | 0.99  | 0.98  | 0.98  | 1                 |
| S | M | E   | 1    | 1     | 1    | 1                | 1     | 0.98  | 0.97  | 0.99              |
| S | S | B   | 0.27 | 0.42  | 0.43 | -0.31            | -0.55 | -0.62 | -0.62 | -0.11             |
| S | S | E   | 0.61 | 0.64  | 0.63 | 0.22             | -0.01 | -0.11 | -0.09 | -0.08             |
| L | N |     | 0.37 | 0.17  | 0.18 | 0.84             | 0.95  | 0.96  | 0.91  | 0.77              |
| M | N |     | 0.32 | 0.12  | 0.12 | 0.8              | 0.94  | 0.95  | 0.88  | 0.73              |
| S | N |     | 0.14 | -0.01 | 0    | 0.6              | 0.76  | 0.87  | 0.77  | 0.81              |
| N | L |     | 1    | 1     | 1    | 1                | 1     | 1     | 1     | 1                 |
| N | M |     | 1    | 1     | 1    | 1                | 1     | 0.99  | 1     | 1                 |
| N | S |     | 0.65 | 0.63  | 0.63 | 0.28             | 0     | -0.11 | -0.12 | -0.14             |
| N | N |     | 0.41 | 0.27  | 0.27 | 0.88             | 0.96  | 0.99  | 0.98  | 0.88              |

Table A7: Corresponds to Figure 7. The first two columns refer to the two methods being assessed for consistency in that row.

| Method | Method | M/L-M/L | M/L-S <sub>bal</sub> | M/L-S <sub>ext</sub> | S-S <sub>bal</sub> | S-S <sub>ext</sub> | M/L-N | S-N  | N-N  |
|--------|--------|---------|----------------------|----------------------|--------------------|--------------------|-------|------|------|
| AIC    | WAIC   | 1       | 0.9                  | 0.9                  | 0.82               | 0.85               | 0.84  | 0.77 | 0.73 |
| AIC    | DIC    | 1       | 0.91                 | 0.9                  | 0.79               | 0.86               | 0.84  | 0.74 | 0.73 |
| AIC    | DIC-p  | 0.99    | 0.73                 | 0.67                 | 0.52               | 0.63               | 0.86  | 0.72 | 0.8  |
| AIC    | BIC    | 0.98    | 0.6                  | 0.57                 | 0.4                | 0.6                | 0.84  | 0.68 | 0.79 |
| AIC    | BF-BS  | 0.98    | 0.64                 | 0.54                 | 0.41               | 0.55               | 0.82  | 0.61 | 0.78 |
| AIC    | BF-TI  | 0.98    | 0.64                 | 0.56                 | 0.4                | 0.57               | 0.85  | 0.61 | 0.78 |
| AIC    | ROPE-a | 1       | 0.84                 | 0.79                 | 0.7                | 0.56               | 0.9   | 0.46 | 0.78 |
| AIC    | DEV    | 1       | 0.8                  | 0.79                 | 0.8                | 0.7                | 0.88  | 0.83 | 0.85 |
| WAIC   | DIC    | 1       | 0.97                 | 0.98                 | 0.97               | 0.92               | 0.96  | 0.96 | 0.91 |
| WAIC   | DIC-p  | 0.99    | 0.66                 | 0.63                 | 0.41               | 0.55               | 0.73  | 0.62 | 0.58 |
| WAIC   | BIC    | 0.98    | 0.54                 | 0.52                 | 0.3                | 0.51               | 0.71  | 0.55 | 0.57 |
| WAIC   | BF-BS  | 0.98    | 0.56                 | 0.49                 | 0.32               | 0.47               | 0.68  | 0.52 | 0.58 |
| WAIC   | BF-TI  | 0.98    | 0.57                 | 0.52                 | 0.3                | 0.49               | 0.72  | 0.51 | 0.57 |
| WAIC   | ROPE-a | 1       | 0.78                 | 0.74                 | 0.64               | 0.5                | 0.77  | 0.39 | 0.58 |
| WAIC   | DEV    | 1       | 0.73                 | 0.74                 | 0.73               | 0.59               | 0.75  | 0.68 | 0.62 |
| DIC    | DIC-p  | 0.99    | 0.66                 | 0.62                 | 0.4                | 0.55               | 0.73  | 0.6  | 0.57 |
| DIC    | BIC    | 0.98    | 0.54                 | 0.52                 | 0.29               | 0.5                | 0.71  | 0.54 | 0.56 |
| DIC    | BF-BS  | 0.98    | 0.56                 | 0.48                 | 0.31               | 0.47               | 0.68  | 0.5  | 0.57 |
| DIC    | BF-TI  | 0.98    | 0.57                 | 0.51                 | 0.29               | 0.48               | 0.72  | 0.5  | 0.57 |
| DIC    | ROPE-a | 1       | 0.78                 | 0.73                 | 0.61               | 0.49               | 0.77  | 0.38 | 0.57 |
| DIC    | DEV    | 1       | 0.73                 | 0.73                 | 0.72               | 0.6                | 0.75  | 0.66 | 0.61 |
| DIC-p  | BIC    | 0.98    | 0.86                 | 0.89                 | 0.85               | 0.93               | 0.98  | 0.88 | 0.99 |
| DIC-p  | BF-BS  | 0.99    | 0.86                 | 0.84                 | 0.85               | 0.88               | 0.95  | 0.84 | 0.98 |
| DIC-p  | BF-TI  | 0.98    | 0.83                 | 0.77                 | 0.82               | 0.83               | 0.96  | 0.8  | 0.96 |
| DIC-p  | ROPE-a | 0.99    | 0.84                 | 0.84                 | 0.6                | 0.79               | 0.96  | 0.62 | 0.93 |
| DIC-p  | DEV    | 0.99    | 0.9                  | 0.86                 | 0.6                | 0.92               | 0.98  | 0.85 | 0.92 |
| BIC    | BF-BS  | 0.99    | 0.92                 | 0.92                 | 0.96               | 0.93               | 0.97  | 0.92 | 0.99 |
| BIC    | BF-TI  | 0.99    | 0.86                 | 0.84                 | 0.91               | 0.88               | 0.98  | 0.84 | 0.97 |
| BIC    | ROPE-a | 0.98    | 0.75                 | 0.78                 | 0.46               | 0.78               | 0.94  | 0.69 | 0.94 |
| BIC    | DEV    | 0.98    | 0.8                  | 0.78                 | 0.46               | 0.9                | 0.96  | 0.82 | 0.91 |
| BF-BS  | BF-TI  | 0.99    | 0.87                 | 0.85                 | 0.95               | 0.9                | 0.95  | 0.86 | 0.98 |
| BF-BS  | ROPE-a | 0.99    | 0.77                 | 0.75                 | 0.46               | 0.78               | 0.91  | 0.69 | 0.94 |
| BF-BS  | DEV    | 0.98    | 0.82                 | 0.75                 | 0.46               | 0.85               | 0.93  | 0.74 | 0.9  |
| BS-TI  | ROPE-a | 0.98    | 0.76                 | 0.74                 | 0.45               | 0.79               | 0.93  | 0.68 | 0.92 |
| BS-TI  | DEV    | 0.98    | 0.8                  | 0.73                 | 0.44               | 0.85               | 0.94  | 0.73 | 0.9  |
| ROPE-a | DEV    | 1       | 0.9                  | 0.9                  | 0.75               | 0.81               | 0.96  | 0.6  | 0.89 |

Table A8: Corresponds to Figure 8. The first two columns refer to the data type and prior type. Prop columns are the number of correct identifications out of a possible 100, and Brier columns are the average Brier scores.

| Data  | Prior | Prop Correct | Prop Drift | Prop Thres | Brier Correct | Brier Drift | Brier Thres |
|-------|-------|--------------|------------|------------|---------------|-------------|-------------|
| Bal   | UP    | 1            | 1          | 1          | -0.92         | -0.93       | -0.93       |
| Bal   | WIP   | 12           | 14         | 12         | -0.55         | -0.56       | -0.65       |
| Bal   | MIP   | 35           | 48         | 40         | 0.05          | 0.09        | -0.11       |
| Bal   | HIP   | 24           | 49         | 55         | 0.02          | 0           | 0.06        |
| Ext   | UP    | 0            | 51         | 47         | -0.79         | -0.16       | -0.24       |
| Ext   | WIP   | 1            | 52         | 48         | -0.54         | -0.06       | -0.13       |
| Ext   | MIP   | 71           | 75         | 96         | 0.49          | 0.46        | 0.85        |
| Ext   | HIP   | 92           | 92         | 100        | 0.48          | 0.27        | 0.96        |
| Drift | UP    | 31           | 31         | 98         | -0.22         | -0.36       | 0.95        |
| Drift | WIP   | 66           | 66         | 98         | 0.38          | 0.03        | 0.9         |
| Drift | MIP   | 82           | 87         | 88         | 0.52          | 0.63        | 0.38        |
| Drift | HIP   | 10           | 71         | 15         | -0.09         | 0.11        | -0.17       |
| Thres | UP    | 29           | 89         | 30         | -0.29         | 0.77        | -0.45       |
| Thres | WIP   | 49           | 80         | 51         | 0.05          | 0.45        | -0.16       |
| Thres | MIP   | 63           | 67         | 77         | 0.2           | -0.06       | 0.53        |
| Thres | HIP   | 44           | 44         | 99         | 0.19          | -0.02       | 0.63        |
| None  | UP    | 100          | 100        | 100        | 1             | 1           | 1           |
| None  | WIP   | 98           | 98         | 100        | 0.94          | 0.94        | 0.99        |
| None  | MIP   | 85           | 90         | 94         | 0.42          | 0.33        | 0.72        |
| None  | HIP   | 29           | 54         | 61         | 0             | 0           | 0.01        |



Table A9: Corresponds to Figure 9. The first two columns refer to the data type and number of trials used per condition. Numbers listed here are the number of correct identifications out of a possible 100, with C columns being model identifications, D being drift identifications, and T being threshold identifications.

| Data  | Trials | C   |     |     |    | D   |     |     |     | T   |     |     |     |
|-------|--------|-----|-----|-----|----|-----|-----|-----|-----|-----|-----|-----|-----|
|       |        | DIC | AIC | BIC | BF | DIC | AIC | BIC | BF  | DIC | AIC | BIC | BF  |
| Bal   | 30     | 16  | 15  | 2   | 1  | 33  | 25  | 9   | 13  | 30  | 27  | 8   | 3   |
| Bal   | 100    | 38  | 29  | 4   | 5  | 55  | 40  | 10  | 13  | 54  | 45  | 7   | 5   |
| Bal   | 300    | 67  | 51  | 12  | 14 | 74  | 58  | 13  | 15  | 76  | 66  | 16  | 14  |
| Bal   | 900    | 99  | 94  | 48  | 44 | 100 | 94  | 48  | 45  | 99  | 98  | 53  | 47  |
| Ext   | 30     | 7   | 3   | 0   | 2  | 39  | 27  | 17  | 29  | 38  | 38  | 25  | 14  |
| Ext   | 100    | 22  | 12  | 0   | 1  | 61  | 46  | 34  | 47  | 61  | 63  | 54  | 39  |
| Ext   | 300    | 51  | 42  | 2   | 1  | 69  | 60  | 43  | 48  | 82  | 82  | 59  | 52  |
| Ext   | 900    | 96  | 96  | 59  | 56 | 99  | 99  | 76  | 79  | 97  | 97  | 83  | 77  |
| Drift | 30     | 30  | 24  | 15  | 16 | 45  | 31  | 17  | 18  | 68  | 79  | 88  | 96  |
| Drift | 100    | 32  | 32  | 17  | 19 | 48  | 38  | 17  | 19  | 64  | 73  | 88  | 92  |
| Drift | 300    | 68  | 69  | 60  | 63 | 92  | 79  | 60  | 63  | 71  | 75  | 92  | 96  |
| Drift | 900    | 72  | 88  | 95  | 98 | 98  | 97  | 95  | 98  | 72  | 88  | 95  | 98  |
| Thres | 30     | 26  | 30  | 14  | 8  | 68  | 81  | 95  | 90  | 39  | 37  | 16  | 10  |
| Thres | 100    | 42  | 44  | 26  | 19 | 65  | 75  | 90  | 90  | 61  | 51  | 28  | 21  |
| Thres | 300    | 55  | 76  | 65  | 53 | 57  | 78  | 90  | 83  | 83  | 84  | 66  | 54  |
| Thres | 900    | 51  | 85  | 99  | 95 | 51  | 85  | 99  | 95  | 98  | 100 | 99  | 96  |
| None  | 30     | 63  | 70  | 92  | 91 | 73  | 80  | 98  | 95  | 82  | 85  | 94  | 96  |
| None  | 100    | 59  | 77  | 98  | 96 | 69  | 84  | 98  | 96  | 81  | 91  | 100 | 100 |
| None  | 300    | 56  | 78  | 99  | 99 | 69  | 89  | 100 | 99  | 79  | 87  | 99  | 100 |
| None  | 900    | 33  | 73  | 99  | 99 | 43  | 84  | 100 | 100 | 69  | 84  | 99  | 99  |

Table A10: Corresponds to Figure 10. The first two columns refer to the data type and number of trials used per condition. Numbers listed here are the average Brier scores, with C columns being model Brier scores, D being drift Brier scores, and T being threshold Brier scores.

| Data  | Trials | C<br>DIC | C<br>AIC | C<br>BIC | C<br>BF | D<br>DIC | D<br>AIC | D<br>BIC | D<br>BF | T<br>DIC | T<br>AIC | T<br>BIC | T<br>BF |
|-------|--------|----------|----------|----------|---------|----------|----------|----------|---------|----------|----------|----------|---------|
| Bal   | 30     | -0.13    | -0.16    | -0.51    | -0.56   | -0.1     | -0.16    | -0.51    | -0.48   | -0.14    | -0.17    | -0.52    | -0.63   |
| Bal   | 100    | 0.06     | -0.02    | -0.56    | -0.62   | 0.03     | -0.07    | -0.59    | -0.56   | 0.02     | -0.03    | -0.56    | -0.69   |
| Bal   | 300    | 0.46     | 0.3      | -0.53    | -0.55   | 0.41     | 0.15     | -0.6     | -0.58   | 0.43     | 0.27     | -0.55    | -0.62   |
| Bal   | 900    | 0.93     | 0.88     | -0.03    | -0.01   | 0.94     | 0.85     | -0.22    | -0.18   | 0.93     | 0.91     | -0.09    | -0.14   |
| Ext   | 30     | -0.12    | -0.2     | -0.5     | -0.5    | -0.03    | -0.12    | -0.4     | -0.31   | -0.05    | -0.09    | -0.37    | -0.49   |
| Ext   | 100    | -0.02    | -0.1     | -0.53    | -0.48   | 0.3      | 0.09     | -0.23    | -0.1    | 0.33     | 0.32     | -0.1     | -0.24   |
| Ext   | 300    | 0.28     | 0.2      | -0.58    | -0.54   | 0.39     | 0.28     | -0.21    | -0.09   | 0.63     | 0.61     | -0.01    | -0.11   |
| Ext   | 900    | 0.91     | 0.91     | 0.24     | 0.24    | 0.94     | 0.93     | 0.35     | 0.46    | 0.93     | 0.94     | 0.53     | 0.42    |
| Drift | 30     | -0.02    | -0.06    | -0.28    | -0.28   | -0.02    | -0.13    | -0.44    | -0.42   | 0.07     | 0.17     | 0.66     | 0.79    |
| Drift | 100    | 0.04     | 0.03     | -0.31    | -0.3    | 0.04     | -0.06    | -0.48    | -0.44   | 0        | 0.15     | 0.68     | 0.8     |
| Drift | 300    | 0.34     | 0.39     | 0.27     | 0.33    | 0.72     | 0.57     | -0.06    | -0.02   | 0        | 0.14     | 0.76     | 0.87    |
| Drift | 900    | 0.5      | 0.62     | 0.91     | 0.95    | 0.97     | 0.96     | 0.87     | 0.93    | 0.2      | 0.37     | 0.87     | 0.93    |
| Thres | 30     | -0.04    | -0.02    | -0.24    | -0.42   | 0.09     | 0.28     | 0.73     | 0.62    | -0.06    | -0.1     | -0.41    | -0.57   |
| Thres | 100    | 0.01     | 0.09     | -0.19    | -0.32   | -0.05    | 0.1      | 0.7      | 0.61    | 0.13     | 0.02     | -0.36    | -0.48   |
| Thres | 300    | 0.21     | 0.4      | 0.35     | 0.14    | -0.09    | 0.08     | 0.66     | 0.52    | 0.63     | 0.65     | 0        | -0.11   |
| Thres | 900    | 0.23     | 0.54     | 0.96     | 0.9     | -0.06    | 0.29     | 0.93     | 0.85    | 0.97     | 0.99     | 0.96     | 0.91    |
| None  | 30     | 0.18     | 0.29     | 0.72     | 0.76    | 0.15     | 0.38     | 0.81     | 0.77    | 0.33     | 0.39     | 0.78     | 0.87    |
| None  | 100    | 0.19     | 0.32     | 0.87     | 0.85    | 0.13     | 0.36     | 0.88     | 0.82    | 0.36     | 0.48     | 0.95     | 0.97    |
| None  | 300    | 0.13     | 0.33     | 0.95     | 0.96    | 0.13     | 0.44     | 0.97     | 0.96    | 0.27     | 0.41     | 0.96     | 0.99    |
| None  | 900    | 0.03     | 0.31     | 0.97     | 0.98    | -0.03    | 0.36     | 0.99     | 0.99    | 0.19     | 0.38     | 0.97     | 0.99    |

Table A11: Corresponds to Figure 11. The first three columns refer to the assessment method (proportion or Brier), what the assessment was for (correct model, drift, or threshold), and the data type. Numbers listed here are either the number of correct identifications out of a possible 20, or the average Brier scores.

| Assess | Type | Data  | AIC   | WAIC  | DIC   | DIC <sub>p</sub> | BIC   | BF-BS | BF-TI | ROPE <sub>a</sub> | DEV |
|--------|------|-------|-------|-------|-------|------------------|-------|-------|-------|-------------------|-----|
| Prop   | C    | None  | 19    | 16    | 16    | 19               | 20    | 18    | 20    | 19                | 19  |
| Prop   | C    | Drift | 8     | 7     | 7     | 6                | 6     | 7     | 9     | 10                | 7   |
| Prop   | C    | Thres | 12    | 7     | 7     | 14               | 16    | 13    | 13    | 11                | 13  |
| Prop   | C    | Bal   | 19    | 19    | 20    | 19               | 19    | 20    | 20    | 20                | 19  |
| Prop   | C    | Ext   | 12    | 12    | 12    | 7                | 8     | 8     | 6     | 11                | 9   |
| Prop   | D    | None  | 19    | 18    | 19    | 20               | 20    | 18    | 20    | 19                | 19  |
| Prop   | D    | Drift | 18    | 18    | 18    | 13               | 11    | 12    | 14    | 19                | 17  |
| Prop   | D    | Thres | 12    | 7     | 7     | 14               | 16    | 13    | 13    | 11                | 13  |
| Prop   | D    | Bal   | 19    | 19    | 20    | 19               | 19    | 20    | 20    | 20                | 19  |
| Prop   | D    | Ext   | 13    | 13    | 13    | 9                | 10    | 10    | 8     | 14                | 11  |
| Prop   | T    | None  | 19    | 17    | 16    | 19               | 20    | 20    | 20    | 19                | 19  |
| Prop   | T    | Drift | 10    | 8     | 8     | 13               | 15    | 15    | 15    | 11                | 10  |
| Prop   | T    | Thres | 20    | 20    | 20    | 20               | 20    | 20    | 20    | 20                | 20  |
| Prop   | T    | Bal   | 20    | 20    | 20    | 20               | 20    | 20    | 20    | 20                | 20  |
| Prop   | T    | Ext   | 19    | 19    | 19    | 18               | 18    | 18    | 18    | 17                | 18  |
| Brier  | C    | None  | 0.45  | 0.33  | 0.27  | 0.89             | 0.97  | 0.88  | 0.97  | 0.66              |     |
| Brier  | C    | Drift | -0.22 | -0.21 | -0.25 | -0.22            | -0.23 | -0.18 | -0.09 | -0.09             |     |
| Brier  | C    | Thres | 0.04  | -0.14 | -0.13 | 0.39             | 0.54  | 0.25  | 0.3   | 0.01              |     |
| Brier  | C    | Bal   | 0.94  | 0.92  | 0.99  | 0.93             | 0.88  | 1     | 1     | 1                 |     |
| Brier  | C    | Ext   | 0.47  | 0.36  | 0.5   | -0.17            | -0.17 | -0.12 | -0.16 | 0.28              |     |
| Brier  | D    | None  | 0.52  | 0.5   | 0.46  | 0.97             | 0.98  | 0.85  | 0.98  | 0.65              |     |
| Brier  | D    | Drift | 0.72  | 0.79  | 0.78  | 0.05             | -0.04 | -0.01 | 0.17  | 0.73              |     |
| Brier  | D    | Thres | -0.15 | -0.28 | -0.27 | 0.08             | 0.3   | -0.04 | -0.02 | -0.16             |     |
| Brier  | D    | Bal   | 0.91  | 0.88  | 0.99  | 0.9              | 0.82  | 1     | 1     | 1                 |     |
| Brier  | D    | Ext   | 0.32  | 0.15  | 0.34  | -0.22            | -0.21 | -0.16 | -0.19 | 0.23              |     |
| Brier  | T    | None  | 0.53  | 0.36  | 0.21  | 0.87             | 0.98  | 0.99  | 0.99  | 0.7               |     |
| Brier  | T    | Drift | -0.28 | -0.31 | -0.35 | -0.08            | 0.01  | 0.09  | 0.1   | -0.17             |     |
| Brier  | T    | Thres | 1     | 1     | 1     | 1                | 1     | 1     | 1     | 1                 |     |
| Brier  | T    | Bal   | 1     | 1     | 1     | 1                | 1     | 1     | 1     | 1                 |     |
| Brier  | T    | Ext   | 0.88  | 0.89  | 0.91  | 0.75             | 0.7   | 0.67  | 0.68  | 0.67              |     |

Table A12: Corresponds to Figure 12. The first two columns refer to the two methods being assessed for consistency in that row.

| Method | Method | None | Drift | Thres | Bal  | Ext  |
|--------|--------|------|-------|-------|------|------|
| AIC    | WAIC   | 0.85 | 0.85  | 0.75  | 1    | 0.9  |
| AIC    | DIC    | 0.85 | 0.85  | 0.75  | 0.95 | 0.9  |
| AIC    | DIC-p  | 0.9  | 0.7   | 0.9   | 1    | 0.75 |
| AIC    | BIC    | 0.95 | 0.55  | 0.8   | 1    | 0.8  |
| AIC    | BF-BS  | 0.85 | 0.55  | 0.85  | 0.95 | 0.8  |
| AIC    | BF-TI  | 0.95 | 0.65  | 0.95  | 0.95 | 0.7  |
| AIC    | ROPE-a | 1    | 0.85  | 0.95  | 0.95 | 0.85 |
| AIC    | DEV    | 1    | 0.85  | 0.95  | 1    | 0.85 |
| WAIC   | DIC    | 0.9  | 0.9   | 1     | 0.95 | 0.9  |
| WAIC   | DIC-p  | 0.85 | 0.6   | 0.65  | 1    | 0.75 |
| WAIC   | BIC    | 0.8  | 0.45  | 0.55  | 1    | 0.8  |
| WAIC   | BF-BS  | 0.75 | 0.45  | 0.6   | 0.95 | 0.8  |
| WAIC   | BF-TI  | 0.8  | 0.5   | 0.7   | 0.95 | 0.7  |
| WAIC   | ROPE-a | 0.85 | 0.7   | 0.8   | 0.95 | 0.75 |
| WAIC   | DEV    | 0.85 | 0.7   | 0.7   | 1    | 0.85 |
| DIC    | DIC-p  | 0.85 | 0.65  | 0.65  | 0.95 | 0.75 |
| DIC    | BIC    | 0.8  | 0.5   | 0.55  | 0.95 | 0.8  |
| DIC    | BF-BS  | 0.75 | 0.5   | 0.6   | 1    | 0.8  |
| DIC    | BF-TI  | 0.8  | 0.55  | 0.7   | 1    | 0.7  |
| DIC    | ROPE-a | 0.85 | 0.7   | 0.8   | 1    | 0.8  |
| DIC    | DEV    | 0.85 | 0.8   | 0.7   | 0.95 | 0.75 |
| DIC-p  | BIC    | 0.95 | 0.8   | 0.9   | 1    | 0.95 |
| DIC-p  | BF-BS  | 0.9  | 0.85  | 0.95  | 0.95 | 0.95 |
| DIC-p  | BF-TI  | 0.95 | 0.85  | 0.95  | 0.95 | 0.95 |
| DIC-p  | ROPE-a | 0.9  | 0.7   | 0.85  | 0.95 | 0.75 |
| DIC-p  | DEV    | 0.9  | 0.8   | 0.95  | 1    | 0.9  |
| BIC    | BF-BS  | 0.9  | 0.95  | 0.85  | 0.95 | 1    |
| BIC    | BF-TI  | 1    | 0.85  | 0.85  | 0.95 | 0.9  |
| BIC    | ROPE-a | 0.95 | 0.5   | 0.75  | 0.95 | 0.8  |
| BIC    | DEV    | 0.95 | 0.6   | 0.85  | 1    | 0.95 |
| BF-BS  | BF-TI  | 0.9  | 0.9   | 0.9   | 1    | 0.9  |
| BF-BS  | ROPE-a | 0.85 | 0.55  | 0.8   | 1    | 0.8  |
| BF-BS  | DEV    | 0.85 | 0.65  | 0.9   | 0.95 | 0.95 |
| BS-TI  | ROPE-a | 0.95 | 0.65  | 0.9   | 1    | 0.7  |
| BS-TI  | DEV    | 0.95 | 0.75  | 1     | 0.95 | 0.85 |
| ROPE-a | DEV    | 1    | 0.8   | 0.9   | 0.95 | 0.8  |
